# Supplementary material for: Modulation of TRPV1 on Odontoblast-like Cells Using Capsazepine-Loaded Nanogels
Source: MDPI journal article supplement (doi:10.3390/pharmaceutics16030355), 2024-03-03
Supplement: s1 [file s1]

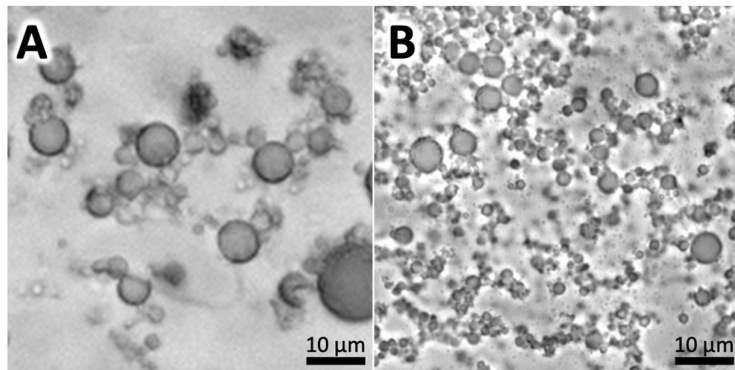

**Figure S1.** Microscopy images of several nanogel prototypes are shown: A. Prototype number 3, and B. Prototype number 4. Adjusting the surfactant percentage and homogenization amplitude facilitates the reduction in the particle size of the nanogels.

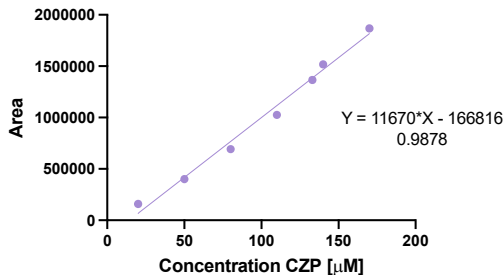

**Figure S2.** Calibration curve used to quantify CZP by HPLC. Serial dilutions of CZP were done and analyzed by HPLC (20-50-80-110-140 and 170 µM). The peak area and CZP concentration were used to develop the calibration curve. Image elaborated using GraphPad Prism 8.
